# Supplementary material for: A MULTI-MINERAL INTERVENTION TO MODULATE COLONIC MUCOSAL PROTEIN PROFILE: Results from a 90-day trial in healthy human subjects
Source: bioRxiv or medRxiv preprint supplement (doi:10.1101/2020.12.30.20249070), 2021-01-04
Supplement: Supplementary file [file media-1.pdf]

## Placebo

## Calcium

## Aquamin

### A. Crypt Length (Pre-Post)

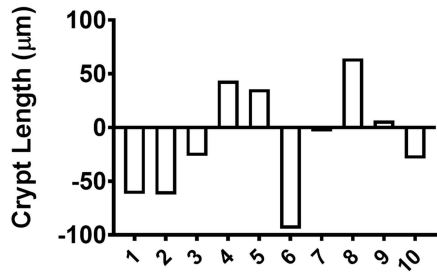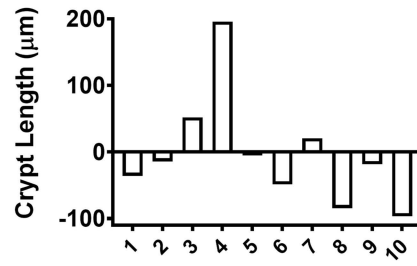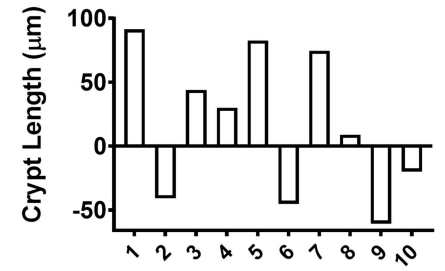

### B. Ki67 (Pre-Post)

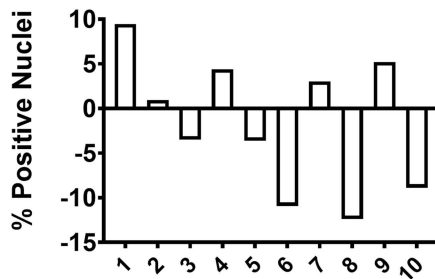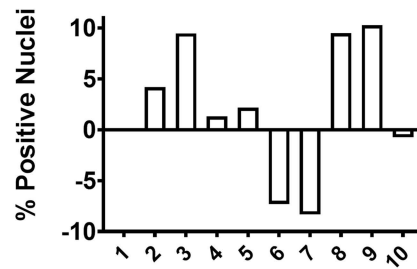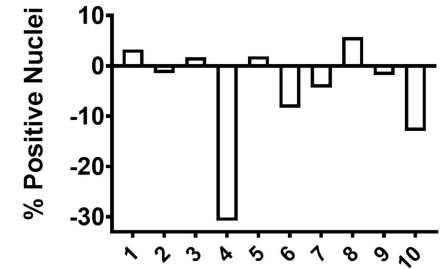

### C. CK20 (Pre-Post)

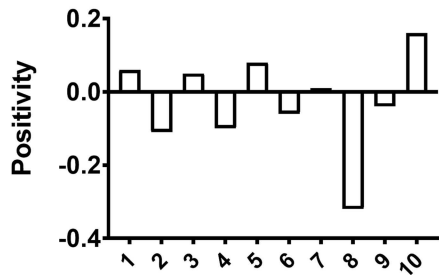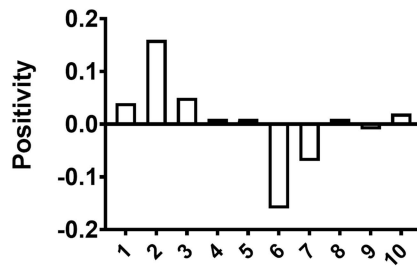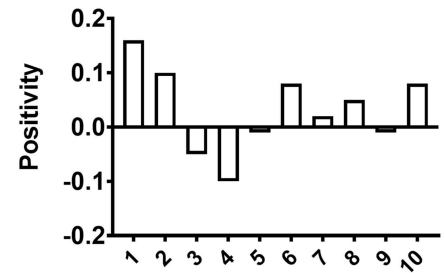

### D. P21 (Pre-Post)

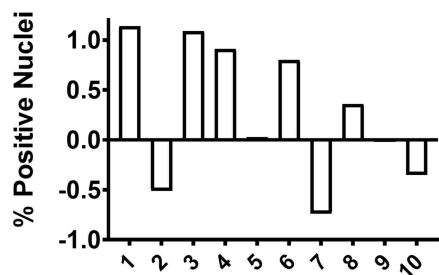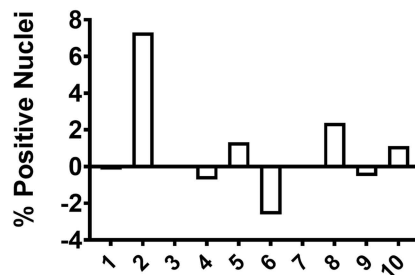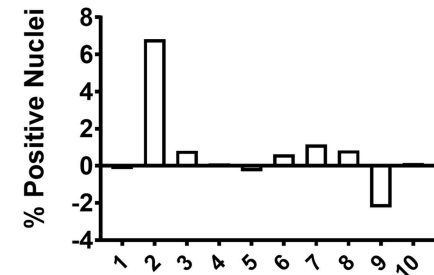

Subjects
