# Supplementary material for: A MULTI-MINERAL INTERVENTION TO MODULATE COLONIC MUCOSAL PROTEIN PROFILE: Results from a 90-day trial in healthy human subjects
Source: bioRxiv or medRxiv preprint supplement (doi:10.1101/2020.12.30.20249070), 2021-01-04

**Placebo: UP**

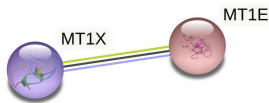

**DOWN**

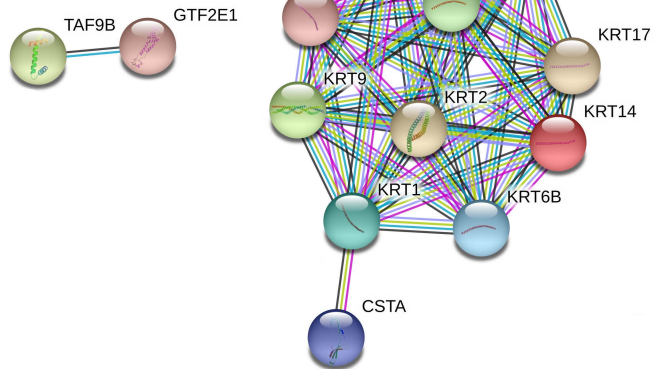

**Calcium: UP**

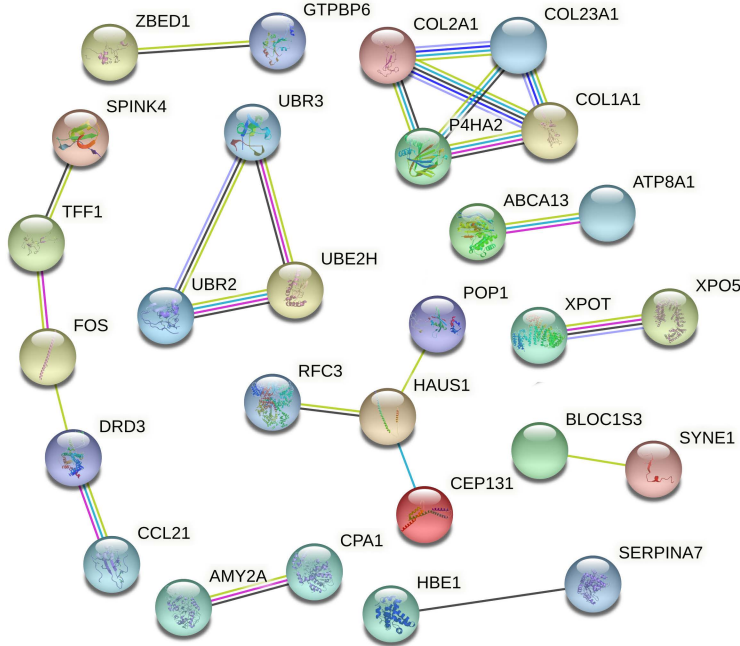

**DOWN**

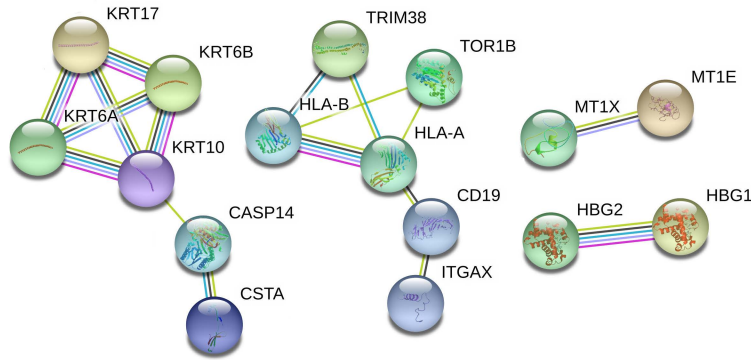

**Aquamin: UP**

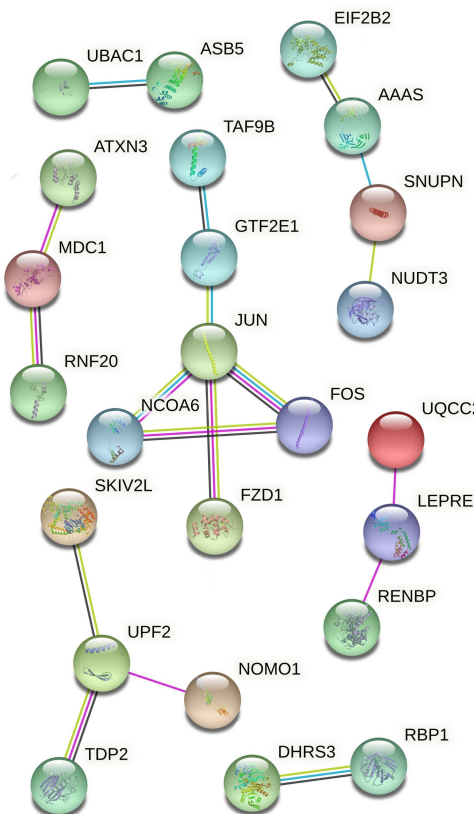

**DOWN**

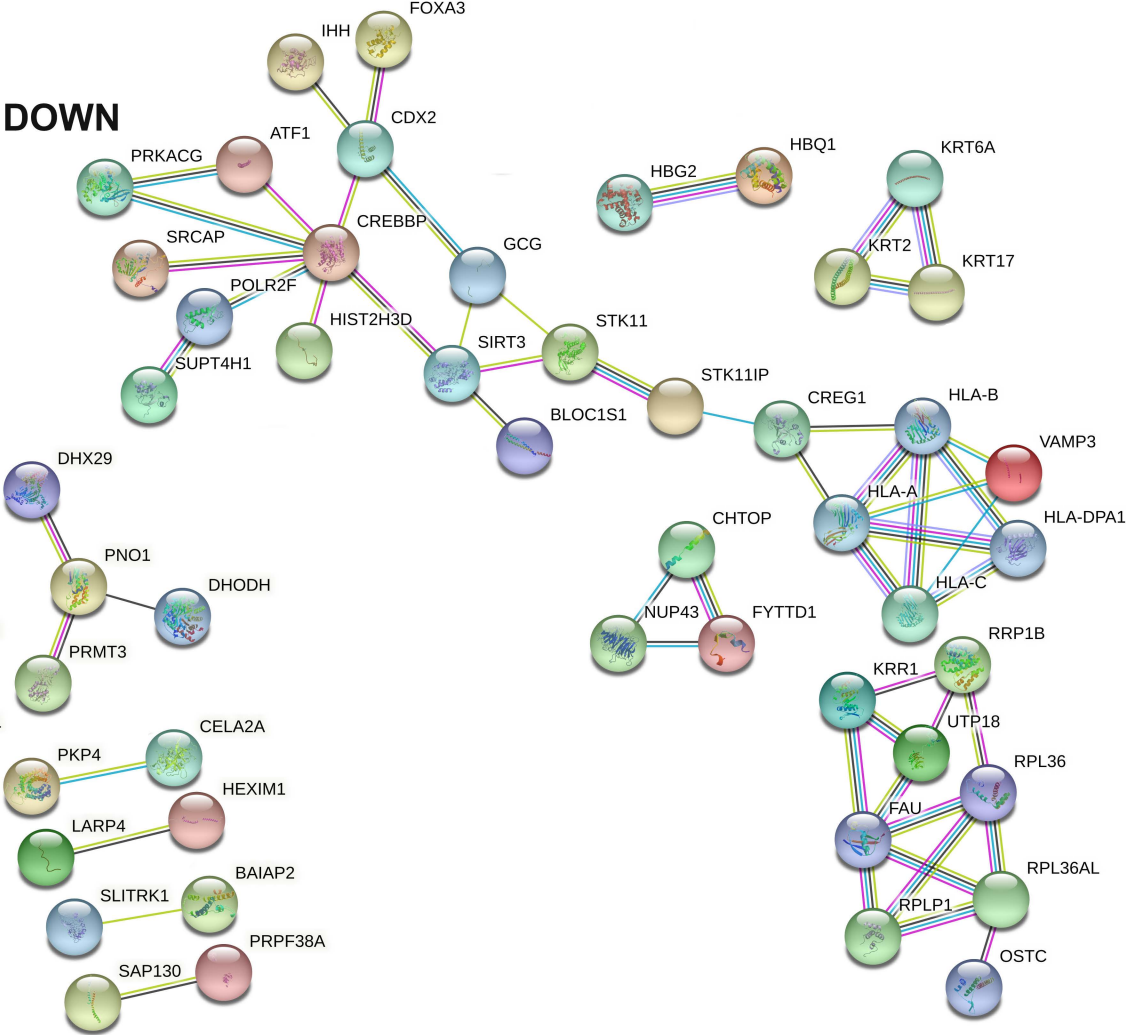

Supplement: Supplementary file [file media-2.pdf]
