# Supplementary material for: A MULTI-MINERAL INTERVENTION TO MODULATE COLONIC MUCOSAL PROTEIN PROFILE: Results from a 90-day trial in healthy human subjects
Source: bioRxiv or medRxiv preprint supplement (doi:10.1101/2020.12.30.20249070), 2021-01-04
Supplement: Supplementary file [file media-3.pdf]

# Significantly Altered Pathways

**Keratinization**  
(Formation of the cornified envelope)

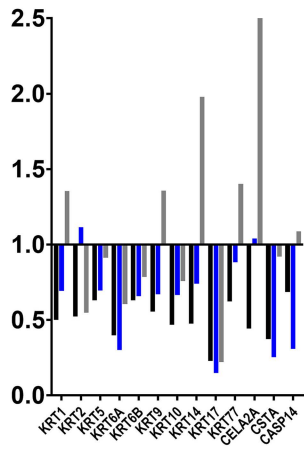

**Type I hemidesmosome assembly**

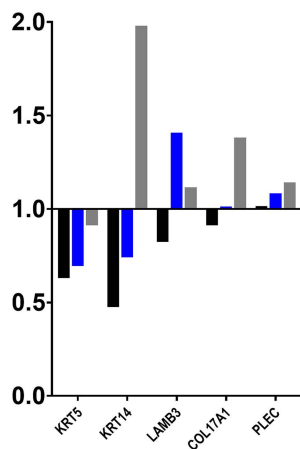

**Collagen biosynthesis and modifying enzymes**

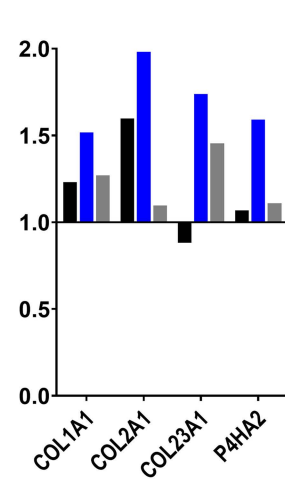

**Collagen degradation**

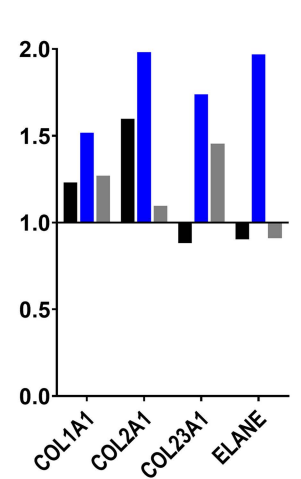

Fold-change Expression

**Cell adhesion molecules**

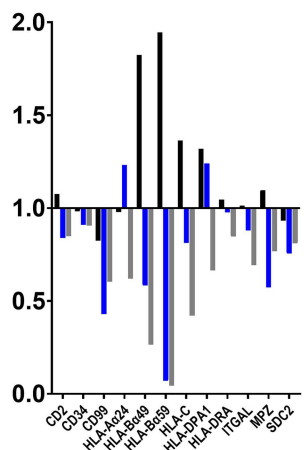

**Phagosome**

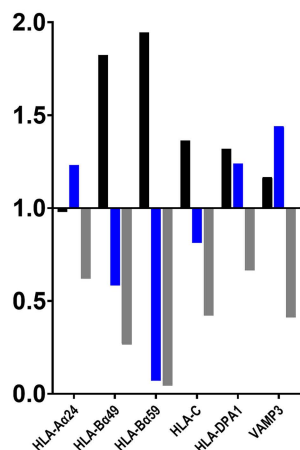

**Endosomal/Vacuolar pathway (alpha/beta, gamma)**

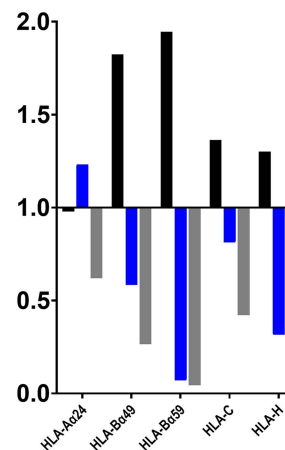

**Interferon Signaling (alpha/beta, gamma)**

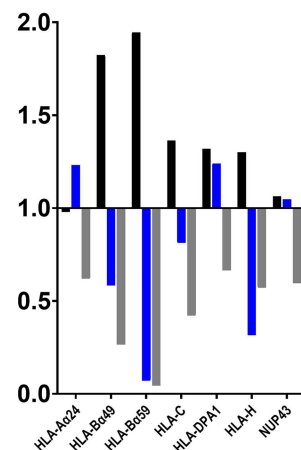

**Immunoregulatory interactions between a Lymphoid and a non-Lymphoid cell**

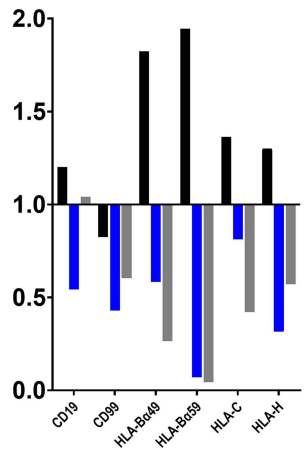

**Antigen processing and presentation (Type I Diabetes, Autoimmune thyroid disease, Allograft rejection, Graft-versus-host disease, Viral myocarditis)**

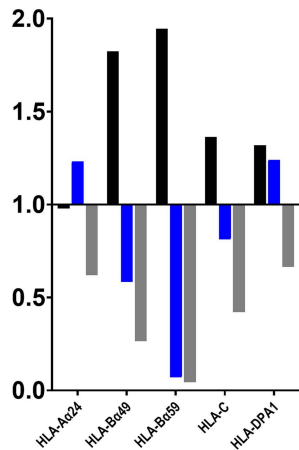

**Viral carcinogenesis, (Herpes simplex infection, HTLV-I infection, Epstein-Barr virus infection)**

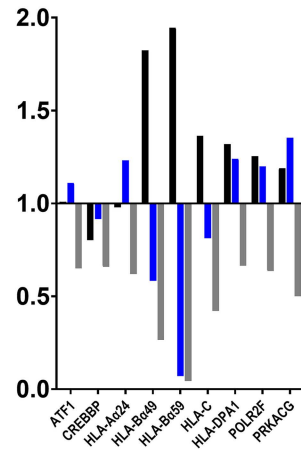

Placebo  
 Calcium  
 Aquamin
