# Supplementary material for: A MULTI-MINERAL INTERVENTION TO MODULATE COLONIC MUCOSAL PROTEIN PROFILE: Results from a 90-day trial in healthy human subjects
Source: bioRxiv or medRxiv preprint supplement (doi:10.1101/2020.12.30.20249070), 2021-01-04
Supplement: Supplementary file [file media-4.pdf]

**Supplement Table 1. List of antibodies used for quantitative immunohistochemistry (qIHC)**

| <u>Antibody</u>                                 | <u>Vendor</u>         | <u>Catalog #</u> | <u>Dilution</u> | <u>Incubation Time</u> | <u>Retrieval Method</u>          |
|-------------------------------------------------|-----------------------|------------------|-----------------|------------------------|----------------------------------|
| Rb <u>Ki-67</u> mAb<br>clone SP6                | Cell Marque           | 275R-16          | 1:250           | 30 min                 | <sup>a</sup> HIER pH 9.0, 20 min |
| Ms <u>CK20</u> mAb<br>clone K <sub>s</sub> 20.8 | Dako                  | M7019            | 1:100           | 60 min                 | FLEX TRS High pH 9.0, 20 min     |
| Ms <u>p21 (WAF1)</u> mAb<br>clone 4D10          | Novocastra<br>(Leica) | NCL-L-<br>WAF-1  | 1:40            | 120 min                | <sup>a</sup> HIER pH 6.0, 40 min |

---

<sup>a</sup>HIER: Heat induced epitope retrieval 10 mM Tris HCl/1 mM EDTA buffer

These antibodies are used for immunohistochemical (IHC) staining of formalin-fixed, paraffin-embedded (FFPE) colon tissue sections.

Positive and negative control tissues (or negative control reagent) ran simultaneously using the same protocol as the actual colon specimens.
