# Supplementary material for: A MULTI-MINERAL INTERVENTION TO MODULATE COLONIC MUCOSAL PROTEIN PROFILE: Results from a 90-day trial in healthy human subjects
Source: bioRxiv or medRxiv preprint supplement (doi:10.1101/2020.12.30.20249070), 2021-01-04
Supplement: Supplementary file [file media-5.pdf]

**Supplement Table 2. Unbiased approach: Upregulated moieties.**

| <u>Protein (Gene)</u>                                | <u>Placebo</u> | <u>Calcium</u> | <u>Aquamin</u> | <u>Calcium</u><br><u>(Compared to Placebo)</u> | <u>Aquamin</u> |
|------------------------------------------------------|----------------|----------------|----------------|------------------------------------------------|----------------|
| <i>Common in all 3 groups (1)</i>                    |                |                |                |                                                |                |
| DENND2A                                              | 1.505          | 1.712          | 3.447          | 1.138                                          | 2.291          |
| <i>Common between Placebo and Calcium groups (1)</i> |                |                |                |                                                |                |
| COL2A1                                               | 1.597          | 1.981          | 1.096          | 1.240                                          | 0.686          |
| <i>Common between Calcium and Aquamin groups (7)</i> |                |                |                |                                                |                |
| ZBED1                                                | 0.991          | 1.824          | 1.717          | 1.840                                          | 1.732          |
| PKP4                                                 | 1.104          | 1.693          | 1.798          | 1.533                                          | 1.628          |
| FOS                                                  | 0.846          | 3.462          | 1.529          | 4.093                                          | 1.808          |
| MSRB1                                                | 1.319          | 2.431          | 1.957          | 1.842                                          | 1.483          |
| TIMM10B                                              | 1.280          | 1.703          | 1.518          | 1.331                                          | 1.186          |
| SLITRK1                                              | 1.498          | 1.667          | 1.643          | 1.113                                          | 1.097          |
| PDSS2                                                | 1.153          | 1.678          | 1.604          | 1.454                                          | 1.391          |
| <i>Unique to Aquamin (90)</i>                        |                |                |                |                                                |                |
| ZNF839                                               | 0.683          | 0.933          | 5.934          | 1.365                                          | 8.685          |
| CHURC1                                               | 0.456          | 0.494          | 2.788          | 1.084                                          | 6.118          |
| BFSP2                                                | 0.252          | 0.370          | 2.765          | 1.468                                          | 10.984         |
| ESRRA                                                | 0.366          | 0.462          | 2.632          | 1.262                                          | 7.195          |
| CELA2A                                               | 0.442          | 1.039          | 2.565          | 2.354                                          | 5.809          |
| HLA-B $\alpha$ 37                                    | 0.202          | 1.323          | 2.364          | 6.560                                          | 11.721         |
| SERF2                                                | 0.524          | 0.626          | 2.340          | 1.194                                          | 4.463          |
| TAF9B                                                | 0.624          | 1.011          | 2.188          | 1.621                                          | 3.506          |
| PRPF38A                                              | 0.719          | 0.788          | 2.188          | 1.096                                          | 3.043          |
| NDUFAF3                                              | 0.952          | 1.212          | 2.182          | 1.273                                          | 2.293          |
| GLCE                                                 | 0.813          | 0.859          | 2.176          | 1.057                                          | 2.677          |
| PMVK                                                 | 0.896          | 0.896          | 2.146          | 1.000                                          | 2.395          |
| GTF2E1                                               | 0.626          | 0.716          | 2.130          | 1.143                                          | 3.403          |
| ATXN3                                                | 0.491          | 0.465          | 2.104          | 0.949                                          | 4.288          |
| NOMO1                                                | 0.873          | 1.366          | 2.019          | 1.565                                          | 2.313          |
| TPK1                                                 | 0.723          | 0.677          | 2.012          | 0.936                                          | 2.784          |
| RNF20                                                | 0.732          | 0.790          | 2.009          | 1.079                                          | 2.744          |
| KRT14                                                | 0.475          | 0.741          | 1.980          | 1.561                                          | 4.170          |
| FAAH                                                 | 0.789          | 0.742          | 1.977          | 0.940                                          | 2.505          |
| ASB5                                                 | 0.839          | 0.933          | 1.969          | 1.113                                          | 2.347          |
| FZD1                                                 | 0.879          | 0.908          | 1.930          | 1.033                                          | 2.196          |
| PITPNM1                                              | 0.964          | 0.854          | 1.906          | 0.886                                          | 1.977          |
| DAAM2                                                | 0.718          | 0.906          | 1.897          | 1.262                                          | 2.644          |
| SAMD13                                               | 0.883          | 0.976          | 1.896          | 1.105                                          | 2.148          |
| FAM174A                                              | 0.549          | 0.532          | 1.865          | 0.968                                          | 3.393          |
| OTULIN                                               | 0.752          | 0.769          | 1.835          | 1.023                                          | 2.439          |
| BAIAP2                                               | 0.527          | 0.840          | 1.810          | 1.594                                          | 3.435          |
| NECTIN1                                              | 0.896          | 0.702          | 1.782          | 0.783                                          | 1.989          |
| SRGAP2C                                              | 0.785          | 0.767          | 1.779          | 0.976                                          | 2.265          |
| PNO1                                                 | 0.731          | 0.870          | 1.774          | 1.190                                          | 2.427          |
| ZNF703                                               | 0.746          | 1.068          | 1.774          | 1.431                                          | 2.377          |
| TMBIM1                                               | 0.781          | 0.825          | 1.765          | 1.057                                          | 2.259          |
| LARP4                                                | 1.039          | 0.918          | 1.756          | 0.884                                          | 1.690          |
| CAPN14                                               | 0.481          | 0.742          | 1.751          | 1.543                                          | 3.640          |

|          |       |       |       |       |       |
|----------|-------|-------|-------|-------|-------|
| SLC12A7  | 0.644 | 0.781 | 1.749 | 1.212 | 2.713 |
| SKIV2L   | 0.833 | 0.711 | 1.747 | 0.855 | 2.098 |
| QTRT2    | 0.836 | 0.973 | 1.735 | 1.164 | 2.076 |
| BCHE     | 0.852 | 0.805 | 1.731 | 0.946 | 2.032 |
| FAM109B  | 0.497 | 1.112 | 1.719 | 2.238 | 3.459 |
| TECPR1   | 0.908 | 1.008 | 1.710 | 1.110 | 1.883 |
| PACSIN3  | 0.662 | 0.799 | 1.710 | 1.207 | 2.583 |
| MDC1     | 0.875 | 1.210 | 1.692 | 1.383 | 1.934 |
| SLC37A3  | 1.088 | 1.170 | 1.690 | 1.076 | 1.553 |
| UQCC2    | 0.797 | 0.839 | 1.684 | 1.053 | 2.113 |
| SLC41A3  | 1.022 | 0.849 | 1.683 | 0.831 | 1.648 |
| AAAS     | 0.831 | 1.000 | 1.682 | 1.203 | 2.022 |
| JUN      | 0.801 | 0.672 | 1.680 | 0.839 | 2.098 |
| TDP2     | 0.793 | 0.867 | 1.678 | 1.094 | 2.116 |
| HEXIM1   | 0.792 | 0.979 | 1.676 | 1.236 | 2.116 |
| SLC39A11 | 0.536 | 1.007 | 1.675 | 1.878 | 3.122 |
| ATL2     | 0.707 | 0.780 | 1.674 | 1.103 | 2.369 |
| SKAP2    | 0.882 | 1.007 | 1.660 | 1.142 | 1.882 |
| FRG1     | 0.592 | 0.733 | 1.658 | 1.238 | 2.801 |
| DHODH    | 0.872 | 0.854 | 1.654 | 0.980 | 1.898 |
| UPF2     | 0.816 | 0.930 | 1.649 | 1.139 | 2.020 |
| BIRC6    | 0.899 | 0.958 | 1.647 | 1.066 | 1.831 |
| EIF2B2   | 0.994 | 0.692 | 1.629 | 0.696 | 1.639 |
| DHX29    | 0.877 | 0.981 | 1.628 | 1.119 | 1.857 |
| FER1L6   | 0.926 | 1.023 | 1.610 | 1.104 | 1.738 |
| ALDH1L1  | 0.801 | 0.813 | 1.609 | 1.015 | 2.008 |
| TMEM106B | 0.891 | 1.064 | 1.609 | 1.194 | 1.805 |
| DHRS3    | 0.845 | 0.785 | 1.601 | 0.928 | 1.894 |
| RAB3B    | 0.857 | 0.857 | 1.590 | 1.000 | 1.856 |
| SOX11    | 1.062 | 1.046 | 1.589 | 0.985 | 1.496 |
| P3H1     | 0.730 | 0.829 | 1.588 | 1.136 | 2.175 |
| COX16    | 0.809 | 0.885 | 1.583 | 1.093 | 1.955 |
| IGKV1-12 | 0.984 | 0.850 | 1.581 | 0.864 | 1.607 |
| WASH6P   | 0.728 | 1.069 | 1.577 | 1.469 | 2.166 |
| CHCHD6   | 0.830 | 1.061 | 1.575 | 1.278 | 1.898 |
| TMSB15B  | 0.854 | 0.804 | 1.570 | 0.941 | 1.838 |
| PRMT3    | 1.337 | 1.134 | 1.564 | 0.848 | 1.170 |
| SULT1C2  | 0.906 | 0.961 | 1.562 | 1.060 | 1.724 |
| CEP162   | 1.004 | 0.880 | 1.558 | 0.877 | 1.551 |
| HEATR3   | 0.860 | 0.921 | 1.551 | 1.071 | 1.804 |
| RENBP    | 1.034 | 1.000 | 1.544 | 0.966 | 1.492 |
| CMTM5    | 0.939 | 0.773 | 1.534 | 0.823 | 1.634 |
| FITM2    | 0.766 | 0.851 | 1.531 | 1.111 | 1.998 |
| MED20    | 0.958 | 0.801 | 1.530 | 0.835 | 1.596 |
| CARD16   | 0.741 | 0.797 | 1.529 | 1.074 | 2.062 |
| TASP1    | 0.754 | 0.859 | 1.528 | 1.139 | 2.026 |
| SLC35A2  | 0.541 | 0.697 | 1.527 | 1.288 | 2.822 |
| NCOA6    | 0.673 | 0.895 | 1.527 | 1.329 | 2.267 |
| SNUPN    | 1.058 | 1.083 | 1.526 | 1.024 | 1.443 |
| KAT8     | 0.840 | 0.867 | 1.522 | 1.031 | 1.811 |
| ARID2    | 0.784 | 0.784 | 1.521 | 1.000 | 1.940 |

|         |       |       |       |       |       |
|---------|-------|-------|-------|-------|-------|
| NUDT3   | 0.813 | 0.765 | 1.514 | 0.942 | 1.863 |
| UBAC1   | 0.829 | 0.922 | 1.505 | 1.111 | 1.815 |
| RBP1    | 0.931 | 0.848 | 1.503 | 0.910 | 1.614 |
| TMEM222 | 0.925 | 0.803 | 1.498 | 0.868 | 1.618 |
| SAP130  | 0.828 | 0.816 | 1.495 | 0.985 | 1.805 |

*Unique to Calcium (66)*

|                   |       |       |       |        |       |
|-------------------|-------|-------|-------|--------|-------|
| DRD3              | 0.640 | 6.746 | 1.129 | 10.544 | 1.764 |
| UBR3              | 0.871 | 3.384 | 1.126 | 3.884  | 1.293 |
| CPA1              | 1.217 | 3.238 | 1.030 | 2.659  | 0.846 |
| ADAD1             | 0.706 | 2.806 | 1.365 | 3.974  | 1.933 |
| GPATCH1           | 0.566 | 2.774 | 1.029 | 4.899  | 1.817 |
| RPUSD4            | 0.774 | 2.647 | 0.876 | 3.419  | 1.132 |
| BLOC1S3           | 1.174 | 2.595 | 1.247 | 2.211  | 1.062 |
| SLC22A11          | 1.289 | 2.473 | 1.247 | 1.919  | 0.968 |
| CD101             | 0.916 | 2.451 | 1.302 | 2.675  | 1.421 |
| TXNDC15           | 1.035 | 2.365 | 1.004 | 2.284  | 0.970 |
| HBE1              | 0.791 | 2.302 | 0.954 | 2.910  | 1.206 |
| FAT3              | 1.007 | 2.276 | 1.147 | 2.261  | 1.139 |
| BCR               | 0.892 | 2.185 | 1.195 | 2.451  | 1.340 |
| CCL21             | 0.940 | 2.163 | 1.125 | 2.300  | 1.197 |
| RARRES1           | 0.903 | 2.108 | 1.341 | 2.335  | 1.485 |
| O43824            | 0.927 | 2.048 | 1.335 | 2.209  | 1.440 |
| LENG1             | 0.905 | 2.044 | 1.218 | 2.259  | 1.346 |
| POP1              | 0.925 | 1.999 | 1.235 | 2.161  | 1.335 |
| HAUS1             | 0.971 | 1.993 | 1.311 | 2.054  | 1.351 |
| ATRN              | 0.944 | 1.971 | 1.248 | 2.087  | 1.321 |
| CEP131            | 0.943 | 1.970 | 1.105 | 2.088  | 1.172 |
| ELANE             | 0.903 | 1.968 | 0.909 | 2.179  | 1.007 |
| DHX30             | 0.755 | 1.901 | 1.125 | 2.520  | 1.490 |
| AMY2A             | 1.172 | 1.872 | 0.517 | 1.598  | 0.441 |
| CROT              | 1.004 | 1.868 | 0.831 | 1.861  | 0.827 |
| PTBP3             | 0.936 | 1.846 | 0.790 | 1.972  | 0.844 |
| NCKAP5L           | 0.878 | 1.811 | 1.153 | 2.063  | 1.313 |
| CAPS              | 0.919 | 1.796 | 1.065 | 1.955  | 1.159 |
| DNAJC1            | 0.846 | 1.784 | 0.802 | 2.109  | 0.948 |
| RNMT              | 0.996 | 1.778 | 1.127 | 1.785  | 1.131 |
| ECHDC3            | 0.873 | 1.777 | 1.046 | 2.035  | 1.198 |
| HLA-A $\alpha$ 31 | 0.797 | 1.773 | 0.856 | 2.224  | 1.074 |
| ABCA13            | 0.988 | 1.747 | 0.975 | 1.768  | 0.988 |
| COL23A1           | 0.882 | 1.738 | 1.454 | 1.971  | 1.649 |
| SMG5              | 0.919 | 1.732 | 1.024 | 1.885  | 1.115 |
| CPSF2             | 1.032 | 1.724 | 1.071 | 1.671  | 1.038 |
| SPINK4            | 0.997 | 1.722 | 0.901 | 1.727  | 0.904 |
| SLC35B3           | 1.034 | 1.721 | 1.135 | 1.664  | 1.097 |
| FAT1              | 0.937 | 1.717 | 1.454 | 1.833  | 1.552 |
| SYNE1             | 0.996 | 1.686 | 1.363 | 1.694  | 1.369 |
| DUSP16            | 0.862 | 1.683 | 1.039 | 1.953  | 1.205 |
| HSP90AA4P         | 0.969 | 1.679 | 1.093 | 1.733  | 1.128 |
| AKAP5             | 1.021 | 1.661 | 1.083 | 1.627  | 1.061 |
| PKLR              | 0.769 | 1.654 | 1.267 | 2.151  | 1.648 |
| TRPM3             | 0.999 | 1.636 | 1.438 | 1.638  | 1.439 |

|                               |       |       |       |       |       |
|-------------------------------|-------|-------|-------|-------|-------|
| XPO5                          | 1.033 | 1.634 | 1.027 | 1.582 | 0.995 |
| METTL13                       | 1.191 | 1.605 | 1.179 | 1.347 | 0.990 |
| WASHC3                        | 1.171 | 1.604 | 0.885 | 1.370 | 0.755 |
| PCIF1                         | 0.892 | 1.604 | 1.039 | 1.798 | 1.165 |
| UBR2                          | 1.011 | 1.602 | 1.062 | 1.585 | 1.050 |
| MRPL54                        | 1.062 | 1.595 | 1.020 | 1.501 | 0.960 |
| P4HA2                         | 1.068 | 1.590 | 1.109 | 1.488 | 1.038 |
| ATP8A1                        | 1.026 | 1.579 | 0.964 | 1.539 | 0.940 |
| TSPAN1                        | 1.047 | 1.565 | 1.033 | 1.494 | 0.987 |
| WDR98                         | 1.235 | 1.556 | 1.166 | 1.260 | 0.944 |
| GGT2                          | 1.018 | 1.554 | 1.313 | 1.527 | 1.290 |
| UBE2H                         | 1.228 | 1.545 | 0.835 | 1.258 | 0.680 |
| XPOT                          | 0.977 | 1.543 | 1.380 | 1.579 | 1.413 |
| SERPINA7                      | 1.063 | 1.542 | 0.750 | 1.450 | 0.705 |
| TFF1                          | 1.215 | 1.536 | 1.062 | 1.265 | 0.874 |
| EMC6                          | 1.082 | 1.522 | 1.013 | 1.406 | 0.936 |
| COL1A1                        | 1.230 | 1.516 | 1.271 | 1.232 | 1.033 |
| STAT4                         | 0.970 | 1.512 | 1.233 | 1.559 | 1.272 |
| CNOT8                         | 0.956 | 1.511 | 1.161 | 1.580 | 1.213 |
| STAB1                         | 1.003 | 1.504 | 1.107 | 1.500 | 1.104 |
| RFC3                          | 0.847 | 1.503 | 1.136 | 1.775 | 1.341 |
| <i>Unique to Placebo (10)</i> |       |       |       |       |       |
| HLA-B $\alpha$ 59             | 1.946 | 0.070 | 0.044 | 0.036 | 0.023 |
| HLA-B $\alpha$ 49             | 1.823 | 0.584 | 0.265 | 0.320 | 0.145 |
| MT1E                          | 1.747 | 0.540 | 1.492 | 0.309 | 0.854 |
| SUPT4H1                       | 1.665 | 1.421 | 0.233 | 0.853 | 0.140 |
| CMTM6                         | 1.583 | 1.136 | 0.183 | 0.717 | 0.116 |
| MT1X                          | 1.578 | 0.580 | 0.675 | 0.368 | 0.427 |
| CTNNBIP1                      | 1.521 | 1.058 | 0.748 | 0.696 | 0.492 |
| FAM84B                        | 1.520 | 1.237 | 0.339 | 0.814 | 0.223 |
| HECW2                         | 1.516 | 0.957 | 0.552 | 0.631 | 0.365 |
| NAT1                          | 1.503 | 0.922 | 0.587 | 0.614 | 0.390 |

The values represent fold-change of abundance ratio as compared to the control (all baseline samples and post-intervention placebo samples). These samples were assessed by TMT based differential proteomic expression by pooling the samples for each group. Protein FDR Confidence for all the proteins was <2%. Proteins were upregulated by 1.5-fold as compared to control. These data are also presented in Figure 3A and 3C.
