# Supplementary material for: A MULTI-MINERAL INTERVENTION TO MODULATE COLONIC MUCOSAL PROTEIN PROFILE: Results from a 90-day trial in healthy human subjects
Source: bioRxiv or medRxiv preprint supplement (doi:10.1101/2020.12.30.20249070), 2021-01-04
Supplement: Supplementary file [file media-6.pdf]

**Supplement Table 3. Unbiased approach: Downregulated moieties.**

| <u>Protein (Gene)</u>                                 | <u>Placebo</u> | <u>Calcium</u> | <u>Aquamin</u> | <u>Calcium</u><br><u>(Compared to Placebo)</u> | <u>Aquamin</u> |
|-------------------------------------------------------|----------------|----------------|----------------|------------------------------------------------|----------------|
| <i>Common in all 3 groups (3)</i>                     |                |                |                |                                                |                |
| KRT6A                                                 | 0.398          | 0.302          | 0.606          | 0.757                                          | 1.520          |
| KRT17                                                 | 0.228          | 0.149          | 0.220          | 0.653                                          | 0.967          |
| MTMR11                                                | 0.665          | 0.576          | 0.557          | 0.867                                          | 0.837          |
| <i>Common between Placebo and Calcium groups (10)</i> |                |                |                |                                                |                |
| BFSP2                                                 | 0.252          | 0.370          | 2.765          | 1.468                                          | 10.984         |
| CHURC1                                                | 0.456          | 0.494          | 2.788          | 1.084                                          | 6.118          |
| ESRRA                                                 | 0.366          | 0.462          | 2.632          | 1.262                                          | 7.195          |
| SERPINB4                                              | 0.435          | 0.225          | 1.086          | 0.518                                          | 2.498          |
| KRT6B                                                 | 0.630          | 0.657          | 0.785          | 1.042                                          | 1.246          |
| SERF2                                                 | 0.524          | 0.626          | 2.340          | 1.194                                          | 4.463          |
| CSTA                                                  | 0.374          | 0.254          | 0.920          | 0.679                                          | 2.457          |
| FAM174A                                               | 0.549          | 0.532          | 1.865          | 0.968                                          | 3.393          |
| ATXN3                                                 | 0.491          | 0.465          | 2.104          | 0.949                                          | 4.288          |
| KRT10                                                 | 0.467          | 0.665          | 0.758          | 1.424                                          | 1.622          |
| <i>Common between Calcium and Aquamin groups (6)</i>  |                |                |                |                                                |                |
| CD99                                                  | 0.824          | 0.429          | 0.604          | 0.521                                          | 0.733          |
| HLA-B α49                                             | 1.823          | 0.584          | 0.265          | 0.320                                          | 0.145          |
| HACD2                                                 | 0.853          | 0.669          | 0.548          | 0.785                                          | 0.642          |
| HLA-H                                                 | 1.300          | 0.315          | 0.571          | 0.242                                          | 0.439          |
| HBG2                                                  | 1.021          | 0.473          | 0.372          | 0.463                                          | 0.365          |
| HLA-B α59                                             | 1.946          | 0.070          | 0.044          | 0.036                                          | 0.023          |
| <i>Common between Placebo and Aquamin groups (4)</i>  |                |                |                |                                                |                |
| FBN1                                                  | 0.515          | 0.734          | 0.655          | 1.426                                          | 1.272          |
| ZNF280D                                               | 0.557          | 1.182          | 0.611          | 2.122                                          | 1.098          |
| KRT2                                                  | 0.524          | 1.116          | 0.549          | 2.131                                          | 1.048          |
| CEP170B                                               | 0.618          | 0.844          | 0.612          | 1.366                                          | 0.990          |
| <i>Unique to Aquamin (78)</i>                         |                |                |                |                                                |                |
| ZNF33B                                                | 1.177          | 1.344          | 0.172          | 1.142                                          | 0.146          |
| CMTM6                                                 | 1.583          | 1.136          | 0.183          | 0.717                                          | 0.116          |
| UTP18                                                 | 1.248          | 1.323          | 0.184          | 1.060                                          | 0.148          |
| SUPT4H1                                               | 1.665          | 1.421          | 0.233          | 0.853                                          | 0.140          |
| SPATA2                                                | 1.402          | 1.306          | 0.296          | 0.931                                          | 0.211          |
| CREG1                                                 | 1.470          | 1.416          | 0.320          | 0.963                                          | 0.218          |
| FAM84B                                                | 1.520          | 1.237          | 0.339          | 0.814                                          | 0.223          |
| MLXIP                                                 | 1.120          | 1.032          | 0.377          | 0.921                                          | 0.337          |
| VAMP3                                                 | 1.167          | 1.440          | 0.412          | 1.233                                          | 0.353          |
| CRYZL1                                                | 1.119          | 1.244          | 0.412          | 1.112                                          | 0.368          |
| HLA-C                                                 | 1.364          | 0.813          | 0.421          | 0.596                                          | 0.309          |
| RPL36                                                 | 1.254          | 0.954          | 0.423          | 0.761                                          | 0.338          |
| FOXA3                                                 | 0.980          | 0.852          | 0.430          | 0.869                                          | 0.439          |
| SPG21                                                 | 0.998          | 0.705          | 0.459          | 0.706                                          | 0.460          |
| FAU                                                   | 1.347          | 1.038          | 0.482          | 0.771                                          | 0.358          |
| PNLIPRP2                                              | 1.016          | 0.944          | 0.483          | 0.929                                          | 0.476          |
| SNX17                                                 | 1.195          | 1.134          | 0.492          | 0.949                                          | 0.412          |
| PRKACG                                                | 1.189          | 1.354          | 0.500          | 1.139                                          | 0.421          |
| CCL15                                                 | 1.479          | 1.323          | 0.510          | 0.895                                          | 0.345          |

|          |       |       |       |       |       |
|----------|-------|-------|-------|-------|-------|
| AMY2A    | 1.172 | 1.872 | 0.517 | 1.598 | 0.441 |
| BLOC1S1  | 1.232 | 1.237 | 0.519 | 1.004 | 0.421 |
| AMIGO1   | 1.162 | 1.028 | 0.521 | 0.885 | 0.449 |
| TPCN1    | 1.104 | 0.953 | 0.531 | 0.863 | 0.481 |
| HBQ1     | 0.878 | 1.176 | 0.539 | 1.340 | 0.614 |
| VMP1     | 1.270 | 0.985 | 0.539 | 0.776 | 0.425 |
| AASS     | 1.488 | 1.128 | 0.540 | 0.758 | 0.363 |
| DAZAP1   | 0.992 | 0.981 | 0.542 | 0.989 | 0.547 |
| HIST2H3A | 1.057 | 1.021 | 0.544 | 0.966 | 0.514 |
| EMC3     | 1.200 | 1.164 | 0.546 | 0.970 | 0.455 |
| HECW2    | 1.516 | 0.957 | 0.552 | 0.631 | 0.365 |
| ADARB1   | 1.073 | 0.912 | 0.554 | 0.850 | 0.516 |
| RNF2     | 1.133 | 1.021 | 0.557 | 0.901 | 0.491 |
| OSTC     | 1.175 | 0.845 | 0.558 | 0.719 | 0.475 |
| TMEM263  | 1.064 | 1.312 | 0.567 | 1.233 | 0.532 |
| STK11    | 0.910 | 0.858 | 0.581 | 0.943 | 0.639 |
| RNASE6   | 1.227 | 1.054 | 0.585 | 0.860 | 0.477 |
| NAT1     | 1.503 | 0.922 | 0.587 | 0.614 | 0.390 |
| CHTOP    | 1.049 | 1.086 | 0.587 | 1.035 | 0.560 |
| GCG      | 0.964 | 0.906 | 0.591 | 0.939 | 0.613 |
| ATP5J2   | 1.180 | 0.990 | 0.595 | 0.838 | 0.504 |
| NUP43    | 1.063 | 1.048 | 0.597 | 0.986 | 0.562 |
| ARHGAP21 | 1.263 | 1.079 | 0.598 | 0.854 | 0.474 |
| RBBP9    | 1.224 | 1.136 | 0.599 | 0.928 | 0.490 |
| ZMYM4    | 1.156 | 1.094 | 0.603 | 0.947 | 0.522 |
| SMC1B    | 1.146 | 1.140 | 0.610 | 0.994 | 0.532 |
| PCM1     | 0.788 | 0.988 | 0.613 | 1.254 | 0.778 |
| HLA-A    | 0.979 | 1.233 | 0.620 | 1.259 | 0.633 |
| IGLV2-14 | 1.250 | 1.262 | 0.623 | 1.010 | 0.498 |
| LIMD2    | 1.122 | 0.830 | 0.624 | 0.740 | 0.556 |
| KRR1     | 1.212 | 1.079 | 0.627 | 0.891 | 0.518 |
| DHRS13   | 0.865 | 0.876 | 0.628 | 1.013 | 0.726 |
| NOX1     | 1.186 | 1.228 | 0.632 | 1.036 | 0.533 |
| POLR2F   | 1.254 | 1.200 | 0.637 | 0.957 | 0.508 |
| CDX1     | 0.702 | 0.671 | 0.638 | 0.955 | 0.908 |
| CAPN13   | 0.825 | 0.748 | 0.638 | 0.907 | 0.773 |
| TANK     | 1.012 | 1.059 | 0.639 | 1.046 | 0.631 |
| STK11IP  | 1.240 | 1.229 | 0.648 | 0.991 | 0.522 |
| SRCAP    | 1.001 | 0.842 | 0.648 | 0.842 | 0.647 |
| MISP3    | 1.143 | 0.930 | 0.648 | 0.813 | 0.567 |
| FYTTD1   | 1.033 | 1.007 | 0.648 | 0.974 | 0.627 |
| DDX3Y    | 0.965 | 0.740 | 0.649 | 0.767 | 0.672 |
| ATF1     | 0.997 | 1.110 | 0.650 | 1.113 | 0.652 |
| LMBRD2   | 1.059 | 1.149 | 0.651 | 1.085 | 0.615 |
| ACOT1    | 1.203 | 0.994 | 0.654 | 0.826 | 0.544 |
| CREBBP   | 0.802 | 0.916 | 0.658 | 1.142 | 0.820 |
| ISCA1    | 1.204 | 1.117 | 0.658 | 0.928 | 0.546 |
| RRP1B    | 0.881 | 1.281 | 0.660 | 1.454 | 0.749 |
| PLEKHA1  | 1.224 | 1.093 | 0.661 | 0.893 | 0.541 |
| TOMM5    | 1.076 | 1.048 | 0.662 | 0.973 | 0.615 |
| IHH      | 1.210 | 1.166 | 0.662 | 0.963 | 0.547 |

|          |       |       |       |       |       |
|----------|-------|-------|-------|-------|-------|
| CDX2     | 0.903 | 1.072 | 0.664 | 1.187 | 0.736 |
| HLA-DPA1 | 1.319 | 1.241 | 0.664 | 0.941 | 0.504 |
| SIRT3    | 1.176 | 1.222 | 0.664 | 1.040 | 0.565 |
| RPL36AL  | 1.234 | 0.952 | 0.665 | 0.771 | 0.539 |
| ELMSAN1  | 0.986 | 1.082 | 0.666 | 1.097 | 0.676 |
| AKR1C1   | 1.131 | 1.034 | 0.668 | 0.914 | 0.590 |
| CCNYL1   | 1.074 | 1.065 | 0.668 | 0.992 | 0.622 |
| RPLP1    | 1.177 | 1.058 | 0.668 | 0.899 | 0.568 |

*Unique to Calcium (45)*

|          |       |       |       |       |       |
|----------|-------|-------|-------|-------|-------|
| CASP14   | 0.684 | 0.308 | 1.087 | 0.450 | 1.590 |
| ARF3     | 1.103 | 0.319 | 0.839 | 0.289 | 0.760 |
| UAP1L1   | 0.888 | 0.367 | 0.934 | 0.414 | 1.052 |
| CTNNA2   | 0.994 | 0.431 | 0.957 | 0.434 | 0.962 |
| HSPA6    | 0.754 | 0.479 | 1.493 | 0.636 | 1.979 |
| VWA5B1   | 1.139 | 0.483 | 1.097 | 0.424 | 0.963 |
| ERCC6    | 0.767 | 0.516 | 1.126 | 0.672 | 1.467 |
| PARVG    | 1.062 | 0.517 | 0.909 | 0.487 | 0.856 |
| TRIM38   | 0.850 | 0.520 | 0.786 | 0.611 | 0.924 |
| NCALD    | 1.018 | 0.528 | 0.909 | 0.519 | 0.894 |
| MT1E     | 1.747 | 0.540 | 1.492 | 0.309 | 0.854 |
| CD19     | 1.202 | 0.544 | 1.041 | 0.453 | 0.866 |
| DCP1B    | 0.828 | 0.545 | 0.905 | 0.658 | 1.092 |
| NAA20    | 0.934 | 0.547 | 0.877 | 0.586 | 0.939 |
| NACA2    | 0.937 | 0.556 | 0.973 | 0.593 | 1.039 |
| GON7     | 0.839 | 0.568 | 0.776 | 0.677 | 0.925 |
| MPZ      | 1.096 | 0.573 | 0.768 | 0.523 | 0.701 |
| RANBP6   | 0.959 | 0.575 | 0.973 | 0.600 | 1.014 |
| SPATA5L1 | 0.795 | 0.579 | 1.020 | 0.728 | 1.283 |
| MT1X     | 1.578 | 0.580 | 0.675 | 0.368 | 0.427 |
| TOGARAM2 | 0.996 | 0.583 | 0.876 | 0.585 | 0.879 |
| TSG101   | 0.955 | 0.583 | 0.967 | 0.611 | 1.013 |
| RPS4Y2   | 1.224 | 0.586 | 0.767 | 0.478 | 0.626 |
| TOR1B    | 1.119 | 0.598 | 0.919 | 0.534 | 0.821 |
| HBG1     | 0.882 | 0.600 | 0.842 | 0.681 | 0.955 |
| PTBP2    | 0.748 | 0.601 | 1.148 | 0.803 | 1.534 |
| AOAH     | 1.171 | 0.607 | 0.897 | 0.519 | 0.766 |
| RNF181   | 1.097 | 0.610 | 0.747 | 0.556 | 0.681 |
| INSL5    | 0.807 | 0.614 | 0.994 | 0.760 | 1.232 |
| VPS72    | 0.926 | 0.617 | 0.901 | 0.667 | 0.973 |
| DOPEY1   | 1.150 | 0.621 | 1.178 | 0.540 | 1.024 |
| HLA-A    | 1.385 | 0.633 | 0.795 | 0.457 | 0.574 |
| PIGU     | 0.972 | 0.633 | 0.939 | 0.651 | 0.966 |
| PPWD1    | 0.970 | 0.634 | 0.843 | 0.654 | 0.868 |
| C2orf72  | 1.055 | 0.641 | 0.925 | 0.607 | 0.876 |
| ITGAX    | 0.935 | 0.641 | 1.367 | 0.685 | 1.461 |
| OSBPL3   | 0.946 | 0.641 | 0.989 | 0.678 | 1.046 |
| SEPHS2   | 0.903 | 0.645 | 1.206 | 0.714 | 1.335 |
| PIGBOS1  | 0.959 | 0.649 | 1.233 | 0.676 | 1.285 |
| F8A1     | 1.020 | 0.649 | 0.908 | 0.637 | 0.890 |
| COX11    | 1.029 | 0.657 | 1.247 | 0.638 | 1.213 |
| FADD     | 0.857 | 0.663 | 1.072 | 0.774 | 1.251 |

|                               |       |       |       |        |        |
|-------------------------------|-------|-------|-------|--------|--------|
| ACSM4                         | 1.083 | 0.663 | 0.774 | 0.612  | 0.714  |
| PHF23                         | 0.709 | 0.668 | 0.729 | 0.942  | 1.029  |
| TRABD                         | 0.964 | 0.668 | 0.980 | 0.693  | 1.016  |
| <i>Unique to Placebo (31)</i> |       |       |       |        |        |
| HLA-B $\alpha$ 37             | 0.202 | 1.323 | 2.364 | 6.560  | 11.721 |
| CELA2A                        | 0.442 | 1.039 | 2.565 | 2.354  | 5.809  |
| HSF1                          | 0.467 | 0.884 | 0.842 | 1.891  | 1.802  |
| KRT14                         | 0.475 | 0.741 | 1.980 | 1.561  | 4.170  |
| CAPN14                        | 0.481 | 0.742 | 1.751 | 1.543  | 3.640  |
| DCD                           | 0.481 | 0.716 | 0.815 | 1.488  | 1.695  |
| FAM109B                       | 0.497 | 1.112 | 1.719 | 2.238  | 3.459  |
| KRT1                          | 0.500 | 0.694 | 1.355 | 1.387  | 2.710  |
| BAIAP2                        | 0.527 | 0.840 | 1.810 | 1.594  | 3.435  |
| SLC39A11                      | 0.536 | 1.007 | 1.675 | 1.878  | 3.122  |
| SLC35A2                       | 0.541 | 0.697 | 1.527 | 1.288  | 2.822  |
| MYH10                         | 0.543 | 0.988 | 1.388 | 1.821  | 2.558  |
| KRT9                          | 0.555 | 0.671 | 1.357 | 1.209  | 2.445  |
| GPATCH1                       | 0.566 | 2.774 | 1.029 | 4.899  | 1.817  |
| NKRF                          | 0.567 | 1.093 | 1.110 | 1.930  | 1.960  |
| FRG1                          | 0.592 | 0.733 | 1.658 | 1.238  | 2.801  |
| CELA3A                        | 0.610 | 1.017 | 0.746 | 1.667  | 1.222  |
| ZSWIM8                        | 0.614 | 1.289 | 1.252 | 2.099  | 2.040  |
| KRT77                         | 0.622 | 0.882 | 1.401 | 1.419  | 2.254  |
| TAF9B                         | 0.624 | 1.011 | 2.188 | 1.621  | 3.506  |
| GTF2E1                        | 0.626 | 0.716 | 2.130 | 1.143  | 3.403  |
| KRT5                          | 0.631 | 0.695 | 0.912 | 1.102  | 1.446  |
| DRD3                          | 0.640 | 6.746 | 1.129 | 10.544 | 1.764  |
| URI1                          | 0.641 | 1.458 | 1.395 | 2.273  | 2.176  |
| SLC12A7                       | 0.644 | 0.781 | 1.749 | 1.212  | 2.713  |
| C19orf53                      | 0.645 | 0.753 | 0.989 | 1.166  | 1.533  |
| UBN2                          | 0.655 | 0.819 | 0.976 | 1.250  | 1.491  |
| JPT2                          | 0.660 | 0.893 | 1.170 | 1.354  | 1.773  |
| PACSIN3                       | 0.662 | 0.799 | 1.710 | 1.207  | 2.583  |
| FAM83F                        | 0.665 | 0.892 | 1.093 | 1.342  | 1.645  |
| FAM117B                       | 0.670 | 0.788 | 0.900 | 1.176  | 1.343  |

The values represent fold-change of abundance ratio as compared to the control (all baseline samples and post-intervention placebo samples). These samples were assessed by TMT based differential proteomic expression by pooling the samples for each group. Protein FDR Confidence for all the proteins was <2%. Proteins were downregulated by 1.5-fold as compared to control. These data are also presented in Figure 3A and 3D.
